# Supplementary material for: Late Quaternary loss of genetic diversity in muskox (Ovibos)
Source: Springer Nature journal article supplement (doi:10.1186/1471-2148-5-49), 2005-10-06
Supplement: 12862_2005_161_MOESM5_ESM.pdf [file 12862_2005_161_MOESM5_ESM.pdf]

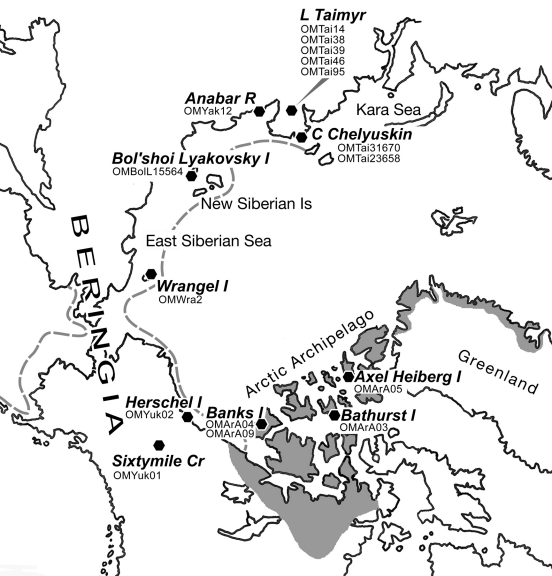

**L Taimyr**

OMTai14

OMTai38

OMTai39

OMTai46

OMTai95

**Anabar R**

OMYak12

Kara Sea

**C Chelyuskin**

OMTtai31670

OMTtai23658

**Bol'shoi Lyakovskiy I**

OMBoll15564

New Siberian Is

East Siberian Sea

**Wrangel I**

OMWra2

**BERINGIA**

Arctic Archipelago

Greenland

**Herschel I**

OMYuk02

**Banks I**

OMArA04

OMArA09

**Axel Heiberg I**

OMArA05

**Bathurst I**

OMArA03

**Sixtymile Cr**

OMYuk01
