# Supplementary material for: Late Quaternary loss of genetic diversity in muskox (Ovibos)
Source: Springer Nature journal article supplement (doi:10.1186/1471-2148-5-49), 2005-10-06
Supplement: 12862_2005_161_MOESM7_ESM.pdf [file 12862_2005_161_MOESM7_ESM.pdf]

# Comparison of $^{14}\text{C}$ Ages of Specimens Yielding Sequence Information

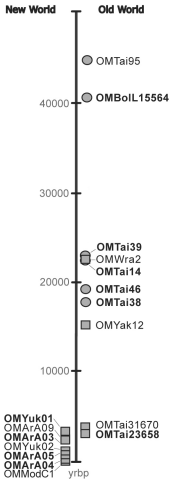

■ Surviving Haplotypes

● Extinct Haplotypes
