# Supplementary material for: Late Quaternary loss of genetic diversity in muskox (Ovibos)
Source: BMC Evol Biol. 2005 Oct 6;5:49. doi: 10.1186/1471-2148-5-49 (PMC1266356; doi:10.1186/1471-2148-5-49)
Supplement: Additional File 1 — Alignment of hypervariable region clones from overlapping PCR fragments used to determine the sequences for each specimen analyzed. The consensus sequence of OMModCl was used as a reference. Dots indicate identity to the consensus sequence. Differences are indicated. Base pair sequences that could not be determined for a given clone are marked "N". Gaps are indicated by "-". The first clone provides the name of each sample according to the labels provided in table 1. The numbers indicate PCR replication + clone number: thus 1.1 indicates PCR 1, first clone sequence. [file 1471-2148-5-49-S1.pdf]

|                   | 5          | 15        | 25        | 35         | 45         | 55         | 65         | 75         | 85         |
|-------------------|------------|-----------|-----------|------------|------------|------------|------------|------------|------------|
| OMModCl.Consensus | ACCACTAACA | CCTTCTATT | ATATACCAC | AAAAACATTA | AGAGCCTTCC | CAGTATCAAA | TCTACCAAAA | CTTTCAATAA | TATAACACTA |
| OMModCl.1.1       |            |           |           | .C.        |            |            |            |            |            |
| 1.2               |            |           |           |            |            |            |            |            |            |
| 1.3               |            |           |           |            |            |            |            |            |            |
| 1.1               |            |           |           |            |            |            |            |            |            |
| 1.2               |            |           |           |            |            |            |            |            |            |
| 1.3               |            |           |           |            |            |            |            |            |            |
| OMYuk01.1.1       |            |           |           |            |            |            |            |            |            |
| 1.2               |            |           |           |            |            |            |            |            |            |
| 1.3               |            |           |           |            |            |            |            |            |            |
| 1.5               |            |           |           |            |            |            |            |            |            |
| 2.1               |            |           |           |            |            |            |            |            |            |
| 2.2               |            |           |           |            |            |            |            |            |            |
| 2.3               |            |           |           |            |            |            |            |            |            |
| 2.4               |            |           |           | .T.        |            |            |            |            |            |
| 1.1               |            |           |           |            |            |            |            |            |            |
| 2.1               |            |           |           |            |            |            |            |            |            |
| 2.2               |            |           |           |            |            |            |            |            |            |
| 2.3               |            |           |           |            |            |            |            |            |            |
| 2.4               |            |           |           |            |            |            |            |            |            |
| OMARA03.1.1       | .N.        |           |           | .G.        |            | .G.        |            |            |            |
| 1.2               | .T.        |           |           |            |            |            |            |            |            |
| 1.3               |            |           |           |            |            |            |            | .G.        |            |
| 1.4               |            |           |           |            | .C.        |            | .C.        | .G.        |            |
| 1.5               |            |           |           |            |            |            |            |            |            |
| 2.1               | .T.        |           | .T.       | .T.        |            |            |            | .T.        |            |
| 2.2               |            |           |           |            |            |            |            |            |            |
| 1.1               |            |           |           |            |            |            |            |            |            |
| 1.2               |            |           |           |            |            |            |            |            |            |
| 1.3               |            |           |           |            |            |            |            |            |            |
| 1.4               |            |           |           |            |            |            |            |            |            |
| 1.5               |            |           |           |            |            |            |            |            |            |
| 2.1               |            |           |           |            |            |            |            |            |            |
| 2.2               |            |           |           |            |            |            |            |            |            |
| 2.3               |            |           |           |            |            |            |            | .T.        |            |
| OMARA04.1.1       |            |           |           |            |            |            |            |            |            |
| 1.2               |            |           |           |            |            |            |            |            |            |
| 1.3               |            |           |           |            |            |            | .N.        |            |            |
| 1.4               |            |           |           |            |            |            |            |            |            |
| 1.5               |            |           |           |            |            |            |            |            |            |
| 2.1               |            |           |           |            |            |            |            |            |            |
| 2.2               |            |           |           |            |            |            |            |            |            |
| 1.1               |            |           |           |            |            |            |            |            |            |
| 1.2               |            |           |           |            |            |            |            |            |            |
| 1.3               |            |           |           |            |            |            |            |            |            |
| 1.4               |            |           |           |            |            |            |            |            |            |
| 2.1               |            |           |           |            |            |            |            |            |            |
| 2.2               |            |           |           |            |            |            |            |            |            |
| 2.3               |            |           |           |            |            |            |            |            |            |
| 2.4               |            |           |           |            |            |            |            |            |            |
| 2.5               |            |           |           |            |            |            |            |            |            |
| OMARA05.1.1       |            |           |           |            | .T.        |            |            |            |            |
| 1.2               |            |           |           |            |            |            |            |            |            |
| 1.3               |            |           |           |            |            |            |            |            |            |
| 1.4               |            |           |           |            |            |            |            |            |            |
| 1.5               |            |           |           |            |            |            |            |            |            |
| 2.1               |            |           |           |            |            |            |            |            |            |
| 2.2               |            |           |           |            |            |            |            |            |            |
| 2.3               |            |           |           |            |            |            |            |            |            |
| 2.4               |            |           |           |            |            |            |            |            |            |
| 1.1               |            |           |           |            |            |            |            |            |            |
| 1.2               |            |           |           |            |            |            |            |            |            |
| 1.3               |            |           |           |            |            |            |            |            |            |
| 1.4               |            |           |           |            |            |            |            |            |            |
| 1.5               |            |           |           |            |            |            |            |            |            |
| 2.1               |            |           |           |            |            |            |            |            |            |
| 2.2               |            |           |           |            |            |            |            |            |            |
| 2.3               |            |           |           |            |            |            |            |            |            |
| 2.4               |            |           |           |            |            |            |            |            |            |
| 2.5               |            |           |           |            |            |            |            |            |            |
| OMWra02.1.1       |            |           |           |            |            |            |            |            |            |
| 1.2               |            |           |           |            |            |            |            |            |            |
| 1.3               |            |           |           |            |            |            |            |            |            |
| 1.4               |            |           |           |            |            |            |            |            |            |
| 1.5               |            |           |           |            |            |            |            | N.         |            |
| 2.1               |            |           |           |            |            |            |            |            |            |
| 2.2               |            |           |           |            |            |            |            |            |            |
| 2.3               |            |           |           |            |            |            |            |            |            |
| 2.4               |            |           |           |            |            |            |            |            |            |
| 2.5               |            |           |           |            |            |            |            |            |            |
| OMYak12.1.1       |            |           |           |            |            |            |            |            |            |
| 1.2               |            |           |           |            |            |            |            |            |            |
| 1.3               |            |           |           |            |            |            |            |            |            |
| 1.4               |            |           |           |            |            |            |            |            |            |
| 1.5               |            |           |           |            |            |            |            |            |            |
| 2.1               |            |           |           |            |            |            | .C.        |            |            |
| 2.2               |            |           |           |            |            |            |            |            |            |
| 2.3               |            |           |           |            |            |            |            |            | .G         |
| 2.4               |            |           |           |            |            |            |            |            |            |
| 2.5               |            |           |           |            |            |            |            |            |            |
| OMTai23658.1.1    |            |           |           |            |            |            |            |            |            |
| 1.2               |            |           |           |            |            |            |            |            |            |
| 1.3               |            |           |           |            |            |            |            |            |            |
| 1.5               |            |           |           |            |            |            |            |            |            |
| 1.6               | .A.        |           |           |            |            |            |            |            |            |
| 2.1               |            |           |           |            |            |            |            |            |            |
| 2.2               |            |           |           |            |            |            |            |            |            |
| 1.1               |            |           |           |            |            |            |            |            |            |
| 1.2               |            |           |           |            |            |            |            |            |            |
| 1.3               |            |           |           |            |            |            |            |            |            |
| 1.4               |            |           |           |            |            |            |            |            |            |
| 1.5               |            |           |           |            |            |            |            |            |            |
| 2.1               |            |           |           |            |            |            |            |            |            |
| 2.2               |            |           |           |            |            |            |            |            |            |
| 2.3               |            |           |           |            |            |            |            |            |            |
| 2.4               |            |           |           |            |            |            |            |            |            |
| 2.5               |            |           |           |            |            |            |            |            |            |
| 3.1               |            |           |           |            |            |            |            |            |            |
| 3.2               |            |           |           |            |            |            |            |            |            |
| 3.3               |            |           |           |            |            |            |            |            |            |
| 3.4               |            |           |           |            |            |            |            |            |            |
| 3.5               |            |           |           |            |            |            |            |            |            |
| 4.1               |            |           |           |            |            |            |            |            |            |
| 4.2               |            |           |           |            |            |            |            |            |            |
| 4.3               |            |           |           |            |            |            |            |            |            |
| 4.4               |            |           |           |            |            |            |            |            |            |
| 4.5               |            |           |           |            |            |            |            |            |            |
| 5.1               |            |           |           |            |            |            |            |            |            |
| 5.2               |            |           |           |            |            |            |            |            |            |
| 5.3               |            |           |           |            |            |            |            |            |            |
| 5.4               |            |           |           |            |            |            |            |            |            |
| 5.5               |            |           |           |            |            |            |            |            |            |
| OMTai14.1.1       | .G.        |           |           |            |            |            |            |            |            |
| 1.2               | .G.        |           |           |            |            |            |            |            |            |
| 2.1               | .G.        |           |           |            |            |            |            |            |            |
| 2.2               | .G.        |           |           |            |            |            |            |            |            |
| 2.3               | .G.        |           |           |            |            |            |            |            |            |
| 2.4               | .G.        |           |           |            |            |            |            |            |            |
| 2.5               | .G.        |           |           |            |            |            |            |            |            |
| 1.1               |            |           |           |            |            |            |            |            |            |
| 1.2               |            |           |           |            |            |            |            |            |            |
| 1.3               |            |           |           |            |            |            |            |            |            |
| 1.4               |            |           |           |            |            |            |            |            |            |
| 1.5               |            |           |           |            |            |            |            |            |            |
| 2.1               |            |           |           |            |            |            |            |            |            |
| 2.2               |            |           |           |            |            |            |            |            |            |
| 2.3               |            |           |           |            |            |            |            |            |            |
| 2.4               |            |           |           |            |            |            |            |            |            |
| 2.5               |            |           |           |            |            |            |            |            |            |
| OMTai38.1.1       |            |           |           |            |            |            |            |            |            |
| 1.2               |            |           |           |            |            |            |            |            |            |
| 1.3               |            |           |           |            |            |            |            |            |            |
| 1.4               |            |           |           |            |            |            |            |            |            |
| 1.5               |            |           |           |            |            |            |            |            |            |
| 2.1               |            |           |           |            |            |            |            |            |            |
| 2.2               |            |           |           |            |            |            |            |            |            |
| 1.1               |            |           |           |            |            |            |            |            |            |
| 1.2               |            |           |           |            |            |            |            |            |            |
| 1.3               |            |           |           |            |            |            |            |            |            |
| 1.4               |            |           |           |            |            |            |            |            |            |
| 2.1               |            |           |           |            |            |            |            |            |            |
| 2.2               |            |           |           |            |            |            |            |            |            |
| 2.3               |            |           |           |            |            |            |            |            |            |
| 2.4               |            |           |           |            |            |            |            |            |            |
| 2.5               |            |           |           |            |            |            |            |            |            |
| OMTai39.1.1       | .G.        |           |           |            |            |            |            |            |            |
| 2.1               | .G.        |           |           |            |            |            |            |            |            |
| 2.2               | .G.        |           |           |            |            |            |            |            |            |
| 2.3               | .G.        |           |           |            |            |            |            |            |            |
| 2.4               | .G.        |           |           |            |            |            |            |            |            |
| 2.5               | .G.        |           |           |            |            |            |            |            |            |
| 1.1               |            |           |           |            |            |            |            |            |            |
| 1.2               |            |           |           |            |            |            |            |            |            |
| 1.3               |            |           |           |            |            |            |            |            |            |
| 1.4               |            |           |           |            |            |            |            |            |            |
| 1.5               |            |           |           |            |            |            |            |            |            |
| 2.1               |            |           |           |            |            |            |            |            |            |
| 2.2               |            |           |           |            |            |            |            |            |            |
| 2.3               |            |           |           |            |            |            |            |            |            |
| 2.4               |            |           |           |            |            |            |            |            |            |
| 2.5               |            |           |           |            |            |            |            |            |            |
| OMTai46.1.1       |            |           |           |            |            |            |            |            |            |
| 1.2               |            |           |           |            |            |            |            |            |            |
| 1.4               |            |           |           |            |            |            |            |            |            |
| 1.5               |            |           |           |            |            |            |            |            |            |
| 1.6               |            |           |           |            |            |            |            |            |            |
| 2.1               |            |           |           |            |            |            |            |            |            |
| 2.2               |            |           |           |            |            |            |            |            |            |
| 2.3               |            |           |           |            |            |            |            |            |            |
| 2.4               |            |           |           |            |            |            |            |            |            |
| 2.5               |            |           |           |            |            |            |            |            |            |
| 1.1               |            |           |           |            |            |            |            |            |            |
| 1.2               |            |           |           |            |            |            |            |            |            |
| 1.3               |            |           |           |            |            |            |            |            |            |
| 1.4               |            |           |           |            |            |            |            |            |            |
| 1.5               |            |           |           |            |            |            |            |            |            |
| 2.1               |            |           |           |            |            |            |            |            |            |
| 2.2               |            |           |           |            |            |            |            |            |            |
| 2.3               |            |           |           |            |            |            |            |            |            |
| 2.4               |            |           |           |            |            |            |            |            |            |
| 2.5               |            |           |           |            |            |            |            |            |            |
| OMTai38.1.1       |            |           |           |            |            |            |            |            |            |
| 1.2               |            |           |           |            |            |            |            |            |            |
| 1.3               |            |           |           |            |            |            |            |            |            |
| 1.4               |            |           |           |            |            |            |            |            |            |
| 1.5               |            |           |           |            |            |            |            |            |            |
| 2.1               |            |           |           |            |            |            |            |            |            |
| 2.2               |            |           |           |            |            |            |            |            |            |
| 2.3               |            |           |           |            |            |            |            |            |            |
| 2.4               |            |           |           |            |            |            |            |            |            |
| 2.5               |            |           |           |            |            |            |            |            |            |
| OMTai39.1.1       | .G.        |           |           |            |            |            |            |            |            |
| 2.1               | .G.        |           |           |            |            |            |            |            |            |
| 2.2               | .G.        |           |           |            |            |            |            |            |            |
| 2.3               | .G.        |           |           |            |            |            |            |            |            |
| 2.4               | .G.        |           |           |            |            |            |            |            |            |
| 2.5               | .G.        |           |           |            |            |            |            |            |            |
| 1.1               |            |           |           |            |            |            |            |            |            |
| 1.2               |            |           |           |            |            |            |            |            |            |
| 1.3               |            |           |           |            |            |            |            |            |            |
| 1.4               |            |           |           |            |            |            |            |            |            |
| 1.5               |            |           |           |            |            |            |            |            |            |
| 2.1               |            |           |           |            |            |            |            |            |            |
| 2.2               |            |           |           |            |            |            |            |            |            |
| 2.3               |            |           |           |            |            |            |            |            |            |
| 2.4               |            |           |           |            |            |            |            |            |            |
| 2.5               |            |           |           |            |            |            |            |            |            |
| OMTai46.1.1       |            |           |           |            |            |            |            |            |            |
| 1.2               |            |           |           |            |            |            |            |            |            |
| 1.4               |            |           |           |            |            |            |            |            |            |
| 1.5               |            |           |           |            |            |            |            |            |            |
| 1.6               |            |           |           |            |            |            |            |            |            |
| 2.1               |            |           |           |            |            |            |            |            |            |
| 2.2               |            |           |           |            |            |            |            |            |            |
| 2.3               |            |           |           |            |            |            |            |            |            |
| 2.4               |            |           |           |            |            |            |            |            |            |
| 2.5               |            |           |           |            |            |            |            |            |            |
| 1.1               |            |           | .A.       |            |            | .G.        |            |            |            |
| 1.2               |            |           |           |            |            | .G.        |            |            |            |
| 1.3               |            |           |           |            |            | .G.        |            |            |            |
| 1.4               |            |           |           |            |            | .G.        |            |            |            |
| 1.5               |            |           |           |            |            | .G.        |            | T.         |            |
| 2.1               |            |           |           |            |            | .G.        |            |            |            |
| 2.2               |            |           |           |            |            | .G.        |            |            |            |
| 2.3               |            |           |           |            |            | .G.        |            |            |            |
| 2.4               |            |           |           |            |            | .G.        |            |            |            |
| 2.5               |            |           |           |            |            | .G.        |            |            |            |
| OMWra02.1.1       |            |           |           |            |            | .G.        |            |            |            |
| 1.2               |            |           |           |            |            | .G.        |            |            |            |
| 1.3               |            |           |           |            |            | .G.        |            |            |            |
| 1.4               |            |           |           |            |            | .G.        |            |            |            |
| 1.5               |            |           |           |            |            | .G.        |            |            |            |
| 2.1               |            |           |           |            |            | .G.        |            |            |            |
| 2.2               |            |           |           |            |            | .G.        |            |            |            |
| 2.3               |            |           |           |            |            | .G.        |            |            |            |
| 2.4               |            |           |           |            |            | .G.        |            |            |            |
| 2.5               |            |           |           |            |            | .G.        |            |            |            |
| OMYak12.1.1       |            |           |           |            |            | .G.        |            |            |            |
| 1.2               |            |           |           |            |            | .G.        |            |            |            |
| 1.3               |            |           |           |            |            | .G.        |            |            |            |
| 1.4               |            |           |           |            |            |            |            |            |            |
