# Supplementary figures and images for: Late Quaternary loss of genetic diversity in muskox (Ovibos)
Source: Springer Nature journal article supplement (doi:10.1186/1471-2148-5-49), 2005-10-06

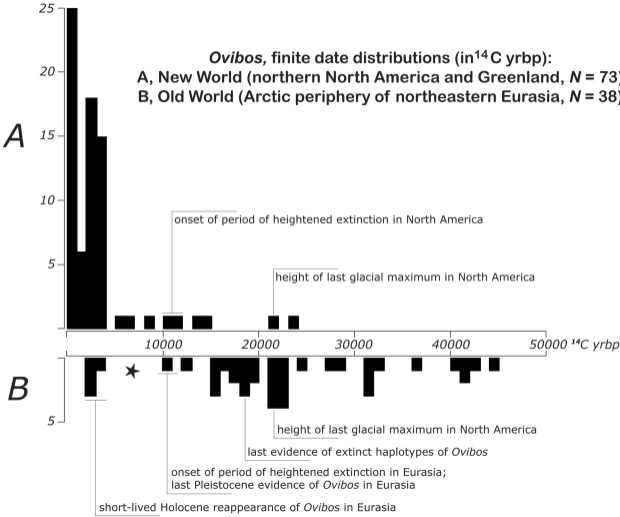

Supplement: 12862_2005_161_MOESM6_ESM.pdf [file 12862_2005_161_MOESM6_ESM.pdf]

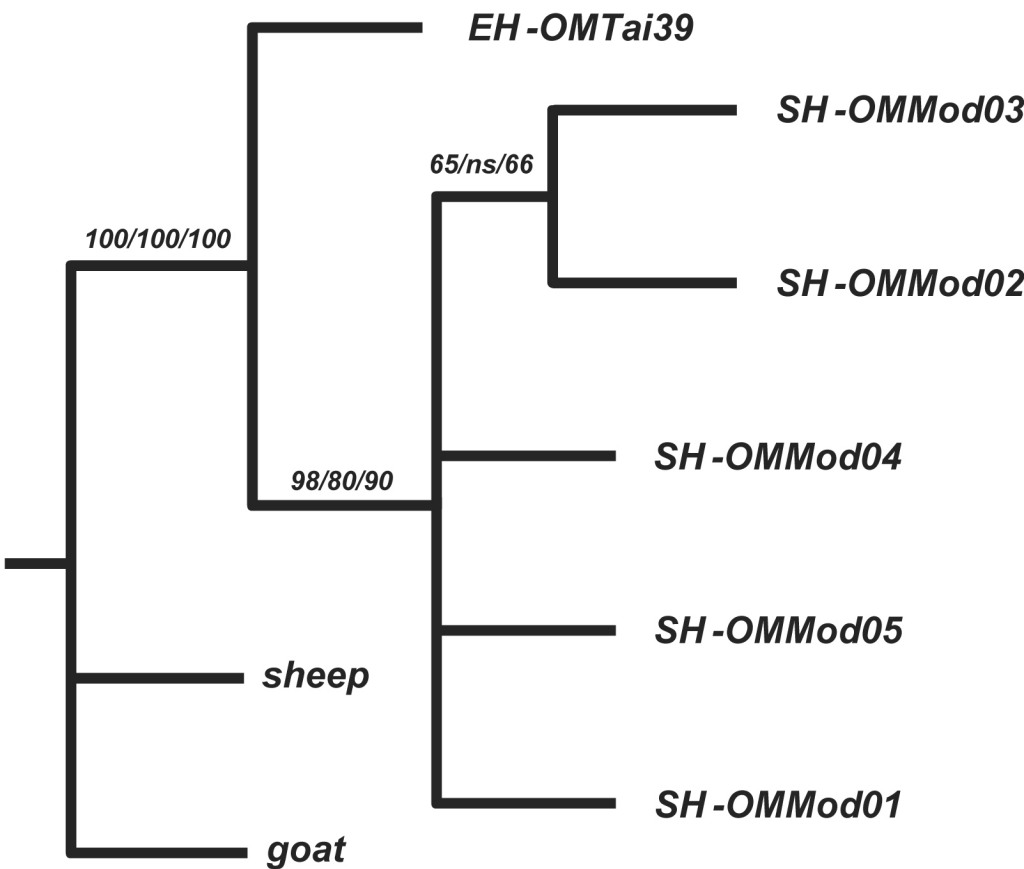

Supplement: 12862_2005_161_MOESM8_ESM.pdf [file 12862_2005_161_MOESM8_ESM.pdf]

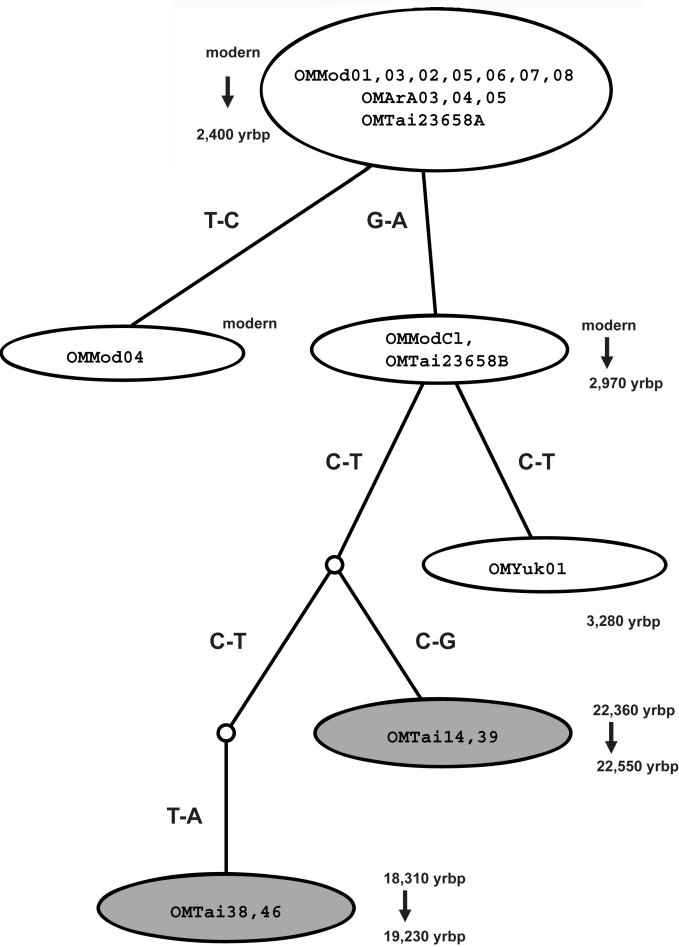

Supplement: 12862_2005_161_MOESM9_ESM.pdf [file 12862_2005_161_MOESM9_ESM.pdf]
